# Supplementary material for: Photocatalytic degradation of methylene blue with a nanocomposite system: synthesis, photocatalysis and degradation pathways
Source: Royal Society of Chemistry journal article supplement (doi:10.1039/c4cp03877k), 2014-12-02

## LC-MS results

### 1. Sample preparation

Sample: Shift 1000  $\mu\text{L}$  samples to sample bottle accurately to prepare sampling.

### 2. Chromatographic conditions

Chromatographic column: ZORBAX Eclipse XDB-C18 5  $\mu\text{m}$  4.6\*150 mm

Volume of sample: 5  $\mu\text{L}$

Wavelength: 230 nm

Column temperature: 25  $^{\circ}\text{C}$

Mobile phase: A: Water B: Acetonitrile

Flow rate: 1.0 mL/min

Gradient:

|    |    |    |
|----|----|----|
| 1  | 50 | 50 |
| 2  | 50 | 50 |
| 10 | 10 | 90 |
| 12 | 10 | 90 |
| 13 | 50 | 50 |
| 15 | 50 | 50 |

### 3. Chromatograms and mass spectra

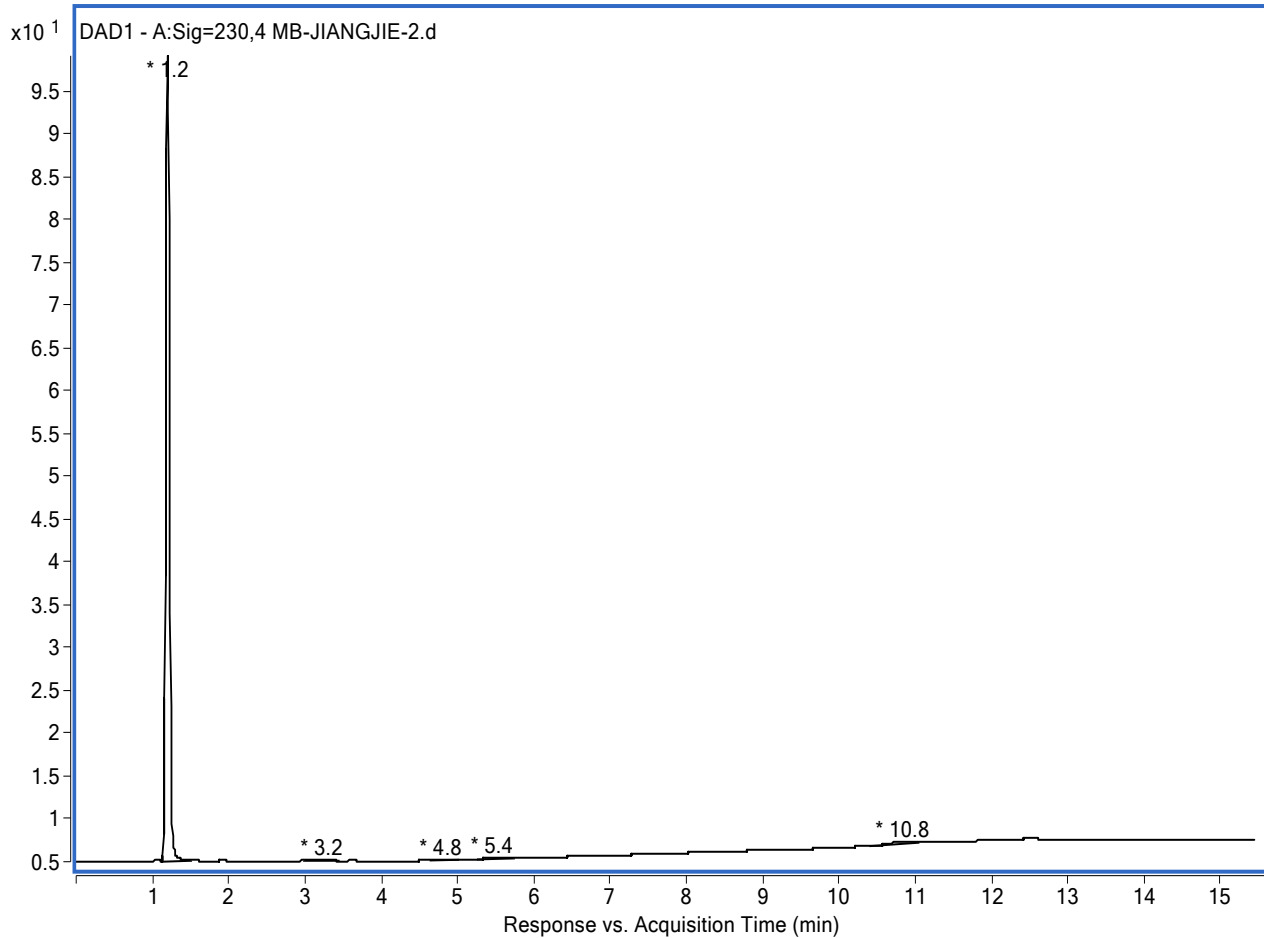

| Peak | RT   | Area   | Height | Area Sum% |
|------|------|--------|--------|-----------|
| 1    | 1.2  | 321.85 | 94.09  | 97.07     |
| 2    | 3.2  | 1.22   | 0.09   | 0.37      |
| 3    | 4.8  | 1.84   | 0.17   | 0.55      |
| 4    | 5.4  | 1.96   | 0.14   | 0.59      |
| 5    | 10.8 | 4.69   | 0.27   | 1.41      |

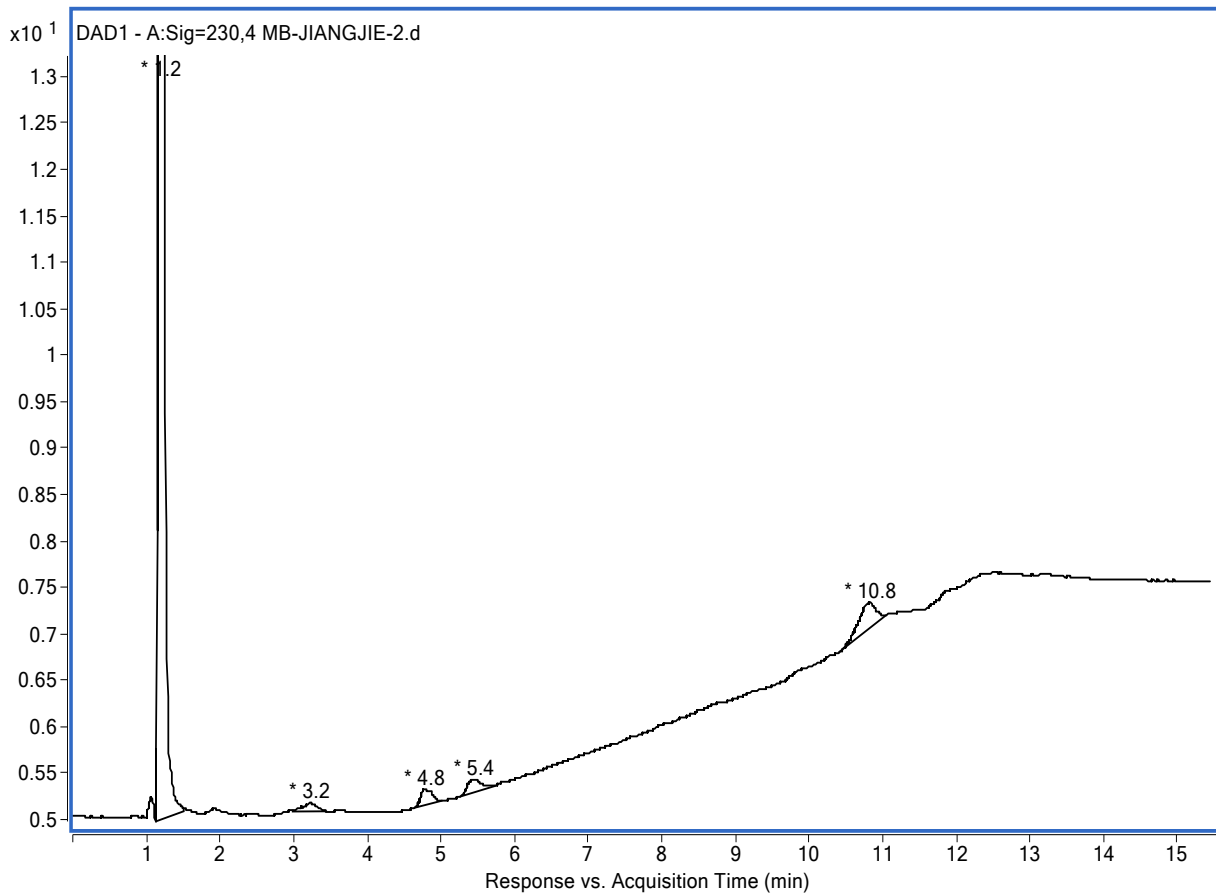

1.2 min

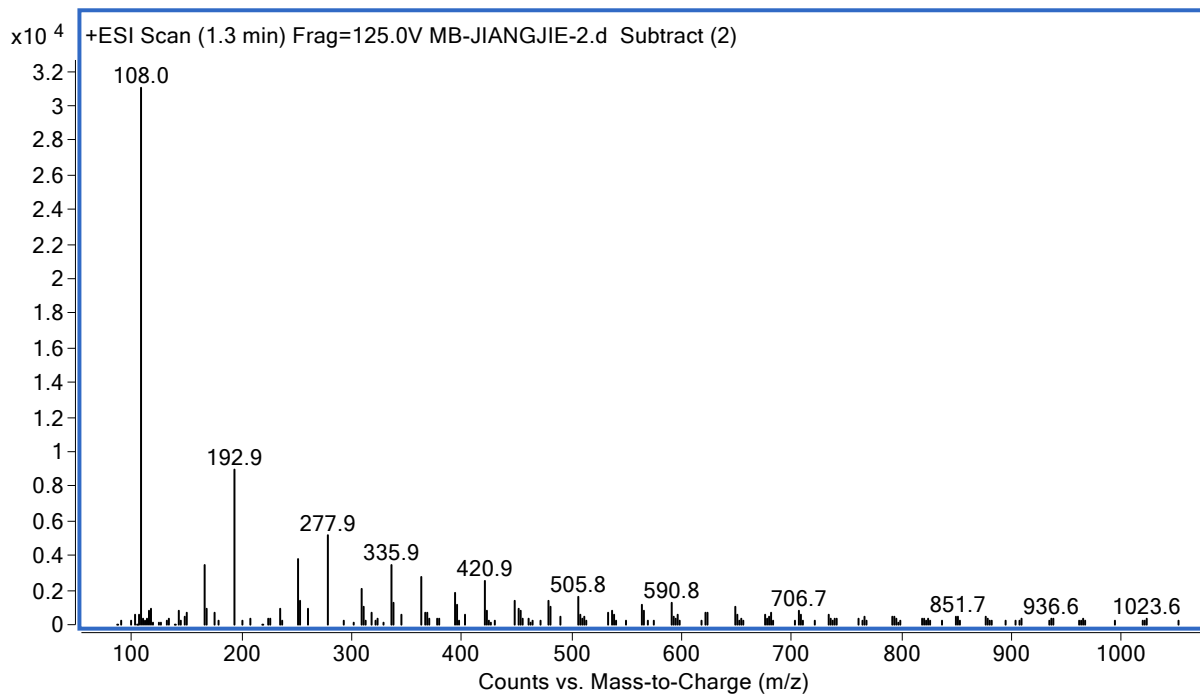

3.2 min

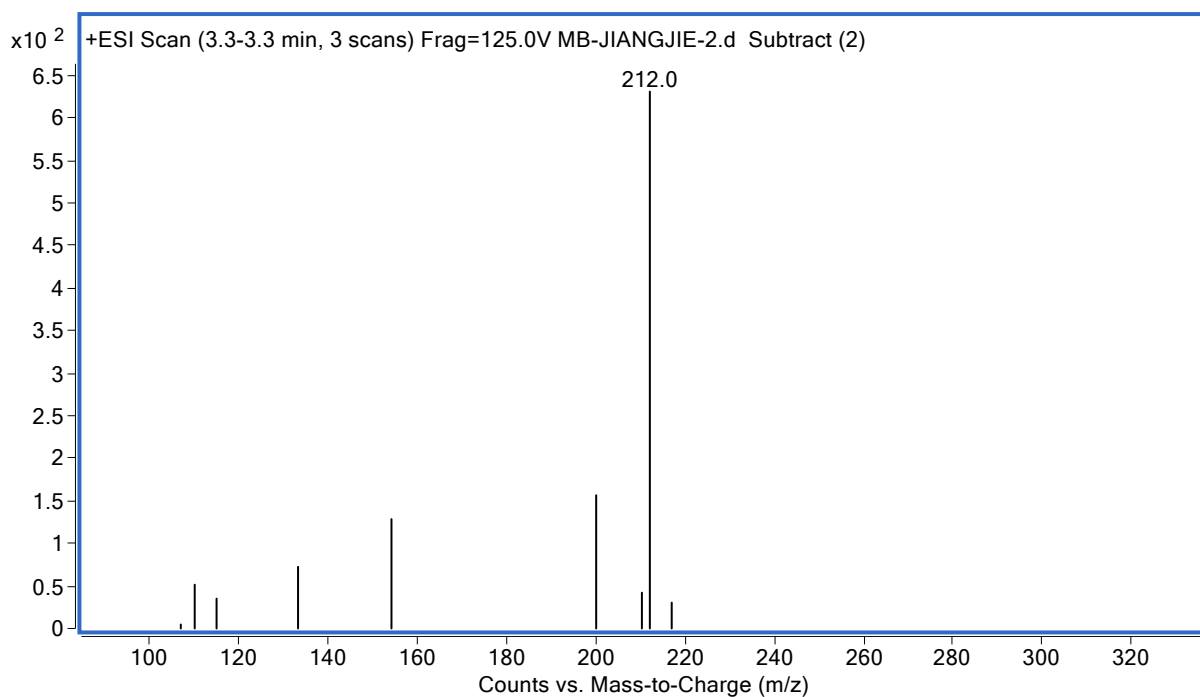

4.8 min

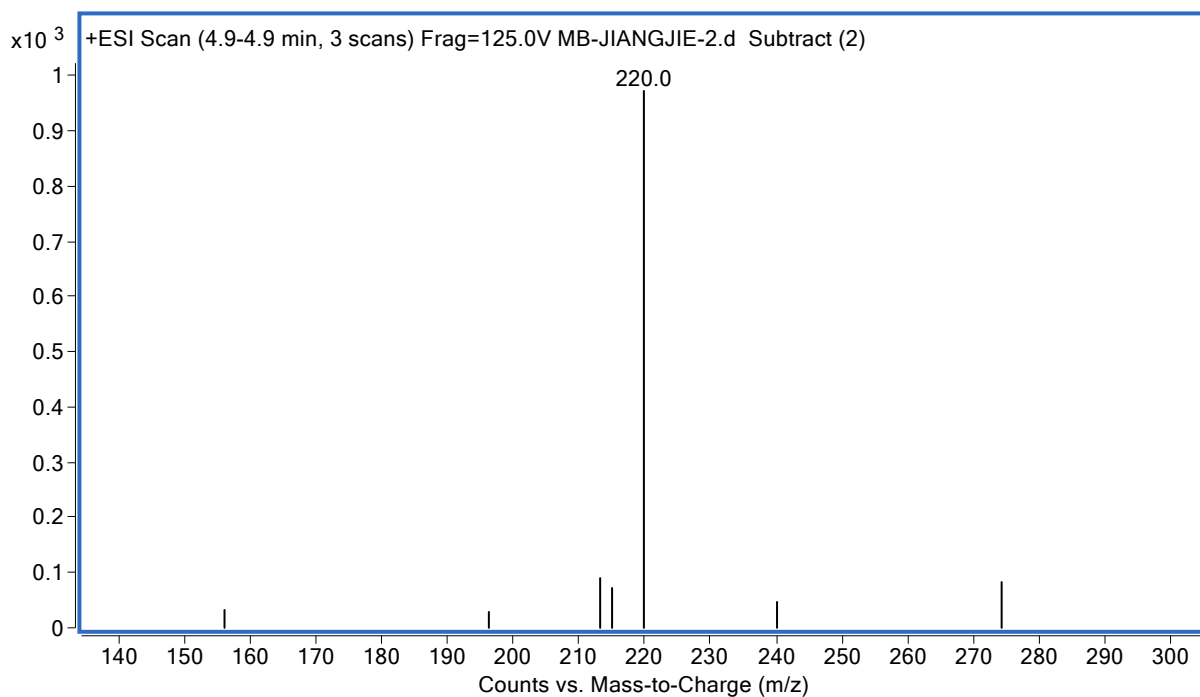

10.8 min

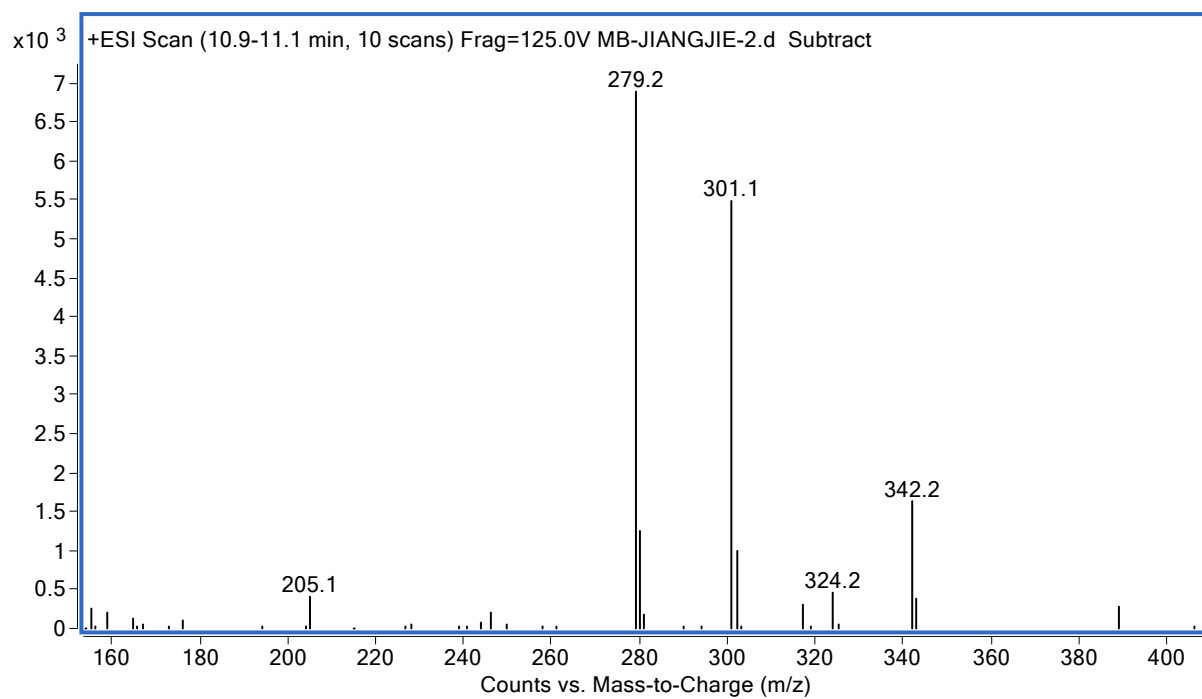

Supplement: c4cp03877k1.pdf [file c4cp03877k1.pdf]
